# Supplementary material
Source: PubMed Central journal article supplement (PMC10034664)
Supplement: jamainternmed-e230456-s003.pdf [file jamainternmed-e230456-s003.pdf]

| <b>*Group Name(s): ANTICOVID Investigators</b> |                   |                              |                         |                                                                                                         |                                                 |                                                                |                                                                                                   |
|------------------------------------------------|-------------------|------------------------------|-------------------------|---------------------------------------------------------------------------------------------------------|-------------------------------------------------|----------------------------------------------------------------|---------------------------------------------------------------------------------------------------|
| <b>*First Name and Middle Initial(s)</b>       | <b>*Last Name</b> | <b>*Suffix (eg, Jr, III)</b> | <b>Academic Degrees</b> | <b>Institution</b>                                                                                      | <b>Location (city, state/province, country)</b> | <b>Role or Contribution, eg, chair, principal investigator</b> | <b>Group (if more than 1 Group listed in the byline) and/or Subgroup (eg, Steering Committee)</b> |
| Gaetan                                         | Plantefevre       | na                           | MD                      | Centre Hospitalier Victor Dupouy                                                                        | Argenteuil, France                              | Investigator                                                   | na                                                                                                |
| Djillali                                       | Annane            | na                           | MD, PhD                 | Hôpital Raymond Poincaré, APHP                                                                          | Garches, France                                 | Investigator                                                   | na                                                                                                |
| Aurélien                                       | Dinh              | na                           | MD                      | Hôpital Raymond Poincaré, APHP                                                                          | Garches, France                                 | Investigator                                                   | na                                                                                                |
| Lilia                                          | Abdeladim         | na                           | MD                      | Hôpital Raymond Poincaré, APHP                                                                          | Garches, France                                 | Investigator                                                   | na                                                                                                |
| Rania                                          | Bounab            | na                           | MD                      | Hôpital Raymond Poincaré, APHP                                                                          | Garches, France                                 | Investigator                                                   | na                                                                                                |
| Pierre                                         | Moïne             | na                           | MD, PhD                 | Hôpital Raymond Poincaré, APHP                                                                          | Garches, France                                 | Investigator                                                   | na                                                                                                |
| Virginie                                       | Maxime            | na                           | MD, PhD                 | Hôpital Raymond Poincaré, APHP                                                                          | Garches, France                                 | Investigator                                                   | na                                                                                                |
| Hayette                                        | Tessa             | na                           | BS                      | Hôpital Raymond Poincaré, APHP                                                                          | Garches, France                                 | Clinical research assistant                                    | na                                                                                                |
| Miguel                                         | Carlos            | na                           | MD                      | Hôpital Raymond Poincaré, APHP                                                                          | Garches, France                                 | Investigator                                                   | na                                                                                                |
| Emmanuelle                                     | Kuperminc         | na                           | MD                      | Hôpital Raymond Poincaré, APHP                                                                          | Garches, France                                 | Investigator                                                   | na                                                                                                |
| Sebastian                                      | Voicu             | na                           | MD                      | Hôpital Lariboisière, AP-HP                                                                             | Paris, France                                   | Investigator                                                   | na                                                                                                |
| Isabelle                                       | Malissin          | na                           | MD                      | Hôpital Lariboisière, AP-HP                                                                             | Paris, France                                   | Investigator                                                   | na                                                                                                |
| Nicolas                                        | Deye              | na                           | MD                      | Hôpital Lariboisière, AP-HP                                                                             | Paris, France                                   | Investigator                                                   | na                                                                                                |
| Aymen                                          | M'Rad             | na                           | MD                      | Hôpital Lariboisière, AP-HP                                                                             | Paris, France                                   | Investigator                                                   | na                                                                                                |
| Thomas                                         | Lacoste-Palasset  | na                           | MD                      | Hôpital Lariboisière, AP-HP                                                                             | Paris, France                                   | Investigator                                                   | na                                                                                                |
| Thomas                                         | Lefevre           | na                           | MD                      | Hôpital Lariboisière, AP-HP                                                                             | Paris, France                                   | Investigator                                                   | na                                                                                                |
| Luc                                            | Haudebourg        | na                           | MD                      | Hôpital Lariboisière, AP-HP                                                                             | Paris, France                                   | Investigator                                                   | na                                                                                                |
| Jean-Michel                                    | Ekhérian          | na                           | MD                      | Hôpital Lariboisière, AP-HP                                                                             | Paris, France                                   | Investigator                                                   | na                                                                                                |
| François                                       | Bagate            | na                           | MD                      | Hôpitaux Universitaires Henri Mondor-Albert Chenevier, Département Médico-Universitaire Médecine, AP-HP | Créteil, France                                 | Investigator                                                   | na                                                                                                |
| Nicolas                                        | de Prost          | na                           | MD, PhD                 | Hôpitaux Universitaires Henri Mondor-Albert Chenevier, Département Médico-Universitaire Médecine, AP-HP | Créteil, France                                 | Investigator                                                   | na                                                                                                |
| Guillaume                                      | carteaux          | na                           | MD, PhD                 | Hôpitaux Universitaires Henri Mondor-Albert Chenevier, Département Médico-Universitaire Médecine, AP-HP | Créteil, France                                 | Investigator                                                   | na                                                                                                |
| Inès                                           | Bendib            | na                           | MD                      | Hôpitaux Universitaires Henri Mondor-Albert Chenevier, Département Médico-Universitaire Médecine, AP-HP | Créteil, France                                 | Investigator                                                   | na                                                                                                |
| Samuel                                         | Tuffet            | na                           | MD                      | Hôpitaux Universitaires Henri Mondor-Albert Chenevier, Département Médico-Universitaire Médecine, AP-HP | Créteil, France                                 | Investigator                                                   | na                                                                                                |
| Julien                                         | Lopinto           | na                           | MD                      | Hôpitaux Universitaires Henri Mondor-Albert Chenevier, Département Médico-Universitaire Médecine, AP-HP | Créteil, France                                 | Investigator                                                   | na                                                                                                |
| Pascale                                        | Labadade          | na                           | MD                      | Hôpitaux Universitaires Henri Mondor-Albert Chenevier, Département Médico-Universitaire Médecine, AP-HP | Créteil, France                                 | Investigator                                                   | na                                                                                                |
| Gaël                                           | Michaud           | na                           | MD                      | Hôpitaux Universitaires Henri Mondor-Albert Chenevier, Département Médico-Universitaire Médecine, AP-HP | Créteil, France                                 | Investigator                                                   | na                                                                                                |
| Brice                                          | Benelli           | na                           | MD                      | Hôpitaux Universitaires Henri Mondor-Albert Chenevier, Département Médico-Universitaire Médecine, AP-HP | Créteil, France                                 | Investigator                                                   | na                                                                                                |
| Anne Fleur                                     | Haudebourg        | na                           | MD                      | Hôpitaux Universitaires Henri Mondor-Albert Chenevier, Département Médico-Universitaire Médecine, AP-HP | Créteil, France                                 | Investigator                                                   | na                                                                                                |
| Ségolène                                       | Gendreau          | na                           | MD                      | Hôpitaux Universitaires Henri Mondor-Albert Chenevier, Département Médico-Universitaire Médecine, AP-HP | Créteil, France                                 | Investigator                                                   | na                                                                                                |
| Enora                                          | Berti             | na                           | MD                      | Hôpitaux Universitaires Henri Mondor-Albert Chenevier, Département Médico-Universitaire Médecine, AP-HP | Créteil, France                                 | Investigator                                                   | na                                                                                                |
| Astrid                                         | Bertier           | na                           | MD                      | Hôpitaux Universitaires Henri Mondor-Albert Chenevier, Département Médico-Universitaire Médecine, AP-HP | Créteil, France                                 | Investigator                                                   | na                                                                                                |
| Romain                                         | Arrestier         | na                           | MD                      | Hôpitaux Universitaires Henri Mondor-Albert Chenevier, Département Médico-Universitaire Médecine, AP-HP | Créteil, France                                 | Investigator                                                   | na                                                                                                |
| Paul                                           | Masi              | na                           | MD                      | Hôpitaux Universitaires Henri Mondor-Albert Chenevier, Département Médico-Universitaire Médecine, AP-HP | Créteil, France                                 | Investigator                                                   | na                                                                                                |
| Etienne                                        | Dufranc           | na                           | MD                      | Hôpitaux Universitaires Henri Mondor-Albert Chenevier, Département Médico-Universitaire Médecine, AP-HP | Créteil, France                                 | Investigator                                                   | na                                                                                                |
| Remi                                           | Coudroy           | na                           | MD, PhD                 | Centre Hospitalo-Universitaire de Poitiers                                                              | Poitiers, France                                | Investigator                                                   | na                                                                                                |
| Arnaud W                                       | Thille            | na                           | MD, PhD                 | Centre Hospitalo-Universitaire de Poitiers                                                              | Poitiers, France                                | Investigator                                                   | na                                                                                                |
| Anne                                           | Veinstein         | na                           | MD                      | Centre Hospitalo-Universitaire de Poitiers                                                              | Poitiers, France                                | Investigator                                                   | na                                                                                                |
| Delphine                                       | Chatellier        | na                           | MD                      | Centre Hospitalo-Universitaire de Poitiers                                                              | Poitiers, France                                | Investigator                                                   | na                                                                                                |
| Jean-Pierre                                    | Frat              | na                           | MD, PhD                 | Centre Hospitalo-Universitaire de Poitiers                                                              | Poitiers, France                                | Investigator                                                   | na                                                                                                |
| Maeva                                          | Rodriguez         | na                           | MD                      | Centre Hospitalo-Universitaire de Poitiers                                                              | Poitiers, France                                | Investigator                                                   | na                                                                                                |
| Faustine                                       | Reynaud           | na                           | MD                      | Centre Hospitalo-Universitaire de Poitiers                                                              | Poitiers, France                                | Investigator                                                   | na                                                                                                |
| Victor                                         | De Roubin         | na                           | MD                      | Centre Hospitalo-Universitaire de Poitiers                                                              | Poitiers, France                                | Investigator                                                   | na                                                                                                |
| François                                       | Arrive            | na                           | MD                      | Centre Hospitalo-Universitaire de Poitiers                                                              | Poitiers, France                                | Investigator                                                   | na                                                                                                |
| Paul                                           | Gabarre           | na                           | MD                      | Hôpital Saint Antoine, AP-HP                                                                            | Paris, France                                   | Investigator                                                   | na                                                                                                |
| Diane                                          | Bollens           | na                           | MD                      | Hôpital Saint Antoine, AP-HP                                                                            | Paris, France                                   | Investigator                                                   | na                                                                                                |
| Patrick                                        | Ingiliz           | na                           | MD                      | Hôpital Saint Antoine, AP-HP                                                                            | Paris, France                                   | Investigator                                                   | na                                                                                                |
| Benedicte                                      | Lefebvre          | na                           | MD                      | Hôpital Saint Antoine, AP-HP                                                                            | Paris, France                                   | Investigator                                                   | na                                                                                                |
| Zineb                                          | Ouzene            | na                           | MD                      | Hôpital Saint Antoine, AP-HP                                                                            | Paris, France                                   | Investigator                                                   | na                                                                                                |
| Thibault                                       | Chiarabini        | na                           | MD                      | Hôpital Saint Antoine, AP-HP                                                                            | Paris, France                                   | Investigator                                                   | na                                                                                                |
| Nadia                                          | Valin             | na                           | MD                      | Hôpital Saint Antoine, AP-HP                                                                            | Paris, France                                   | Investigator                                                   | na                                                                                                |

|              |              |    |         |                                                              |                          |              |    |
|--------------|--------------|----|---------|--------------------------------------------------------------|--------------------------|--------------|----|
| Tomas        | Urbina       | na | MD      | Hôpital Saint Antoine, AP-HP                                 | Paris, France            | Investigator | na |
| Vincent      | Bonny        | na | MD      | Hôpital Saint Antoine, AP-HP                                 | Paris, France            | Investigator | na |
| Naïke        | Bige         | na | MD      | Hôpital Saint Antoine, AP-HP                                 | Paris, France            | Investigator | na |
| Karine       | Lacombe      | na | MD, PhD | Hôpital Saint Antoine, AP-HP                                 | Paris, France            | Investigator | na |
| Muriel       | Fartoukh     | na | MD, PhD | Hôpital Tenon, APHP                                          | Paris, France            | Investigator | na |
| Cyrielle     | Desnos       | na | MD      | Hôpital Tenon, APHP                                          | Paris, France            | Investigator | na |
| Guillaume    | Voiriot      | na | MD, PhD | Hôpital Tenon, APHP                                          | Paris, France            | Investigator | na |
| Michel       | Djibré       | na | MD      | Hôpital Tenon, APHP                                          | Paris, France            | Investigator | na |
| Clarisse     | Blayau       | na | MD      | Hôpital Tenon, APHP                                          | Paris, France            | Investigator | na |
| Aude         | Gibelin      | na | MD      | Hôpital Tenon, APHP                                          | Paris, France            | Investigator | na |
| Julien       | Dessajan     | na | MD      | Hôpital Tenon, APHP                                          | Paris, France            | Investigator | na |
| Ludovic      | Lassel       | na | MD      | Hôpital Tenon, APHP                                          | Paris, France            | Investigator | na |
| Pierre-Marie | Bertrand     | na | MD      | Hôpital Simone Veil, Centre Hospitalier de Cannes            | Cannes, France           | Investigator | na |
| Raphael      | Chambon      | na | MD      | Hôpital Simone Veil, Centre Hospitalier de Cannes            | Cannes, France           | Investigator | na |
| Nicolas      | Clément      | na | MD      | Hôpital Simone Veil, Centre Hospitalier de Cannes            | Cannes, France           | Investigator | na |
| Oumar        | Sy           | na | MD      | Groupe Hospitalier Sud Ile de France                         | Melun, France            | Investigator | na |
| Sebastien    | Jochmans     | na | MD      | Groupe Hospitalier Sud Ile de France                         | Melun, France            | Investigator | na |
| Claire       | Dupuis       | na | MD, PHD | Centre Hospitalo-Universitaire Gabriel-Montpied              | Clermont-Ferrand, France | Investigator | na |
| Laure        | Calvet       | na | MD      | Centre Hospitalo-Universitaire Gabriel-Montpied              | Clermont-Ferrand, France | Investigator | na |
| François     | Thouy        | na | MD      | Centre Hospitalo-Universitaire Gabriel-Montpied              | Clermont-Ferrand, France | Investigator | na |
| Kevin        | Grapin       | na | MD      | Centre Hospitalo-Universitaire Gabriel-Montpied              | Clermont-Ferrand, France | Investigator | na |
| Guillaume    | Laurichesse  | na | MD      | Centre Hospitalo-Universitaire Gabriel-Montpied              | Clermont-Ferrand, France | Investigator | na |
| Frederic     | Kinda        | na | MD      | Centre Hospitalo-Universitaire Gabriel-Montpied              | Clermont-Ferrand, France | Investigator | na |
| Pierre       | Couhault     | na | MD      | Centre Hospitalo-Universitaire Gabriel-Montpied              | Clermont-Ferrand, France | Investigator | na |
| Loïc         | Dopeux       | na | MD      | Centre Hospitalo-Universitaire Gabriel-Montpied              | Clermont-Ferrand, France | Investigator | na |
| Julien       | Goutay       | na | MD      | Centre Hospitalo-Universitaire Lille                         | Lille, France            | Investigator | na |
| Geoffrey     | Ledoux       | na | MD      | Centre Hospitalo-Universitaire Lille                         | Lille, France            | Investigator | na |
| Romain       | Tortuyaux    | na | MD      | Centre Hospitalo-Universitaire Lille                         | Lille, France            | Investigator | na |
| Alexandre    | Gaudet       | na | MD      | Centre Hospitalo-Universitaire Lille                         | Lille, France            | Investigator | na |
| Anahita      | Rouze        | na | MD      | Centre Hospitalo-Universitaire Lille                         | Lille, France            | Investigator | na |
| Anne-Sophie  | Moreau       | na | MD      | Centre Hospitalo-Universitaire Lille                         | Lille, France            | Investigator | na |
| Patrick      | Girardi      | na | MD      | Centre Hospitalo-Universitaire Lille                         | Lille, France            | Investigator | na |
| Mercedes     | Jourdain     | na | MD      | Centre Hospitalo-Universitaire Lille                         | Lille, France            | Investigator | na |
| Julien       | Poissy       | na | MD      | Centre Hospitalo-Universitaire Lille                         | Lille, France            | Investigator | na |
| Raphael      | Favory       | na | MD      | Centre Hospitalo-Universitaire Lille                         | Lille, France            | Investigator | na |
| Saadala      | Nseir        | na | MD, PhD | Centre Hospitalo-Universitaire Lille                         | Lille, France            | Investigator | na |
| Matthieu     | Buscot       | na | MD      | Hôpital l'Archet 1, Centre Hospitalier Universitaire de Nice | Nice, France             | Investigator | na |
| Jean         | Dellamonica  | na | MD      | Hôpital l'Archet 1, Centre Hospitalier Universitaire de Nice | Nice, France             | Investigator | na |
| Clément      | Saccheri     | na | MD      | Hôpital l'Archet 1, Centre Hospitalier Universitaire de Nice | Nice, France             | Investigator | na |
| Elisa        | Demonchy     | na | MD      | Hôpital l'Archet 1, Centre Hospitalier Universitaire de Nice | Nice, France             | Investigator | na |
| David        | Chirio       | na | MD      | Hôpital l'Archet 1, Centre Hospitalier Universitaire de Nice | Nice, France             | Investigator | na |
| Karine       | Risso        | na | MD      | Hôpital l'Archet 1, Centre Hospitalier Universitaire de Nice | Nice, France             | Investigator | na |
| Nihal        | Martis       | na | MD      | Hôpital l'Archet 1, Centre Hospitalier Universitaire de Nice | Nice, France             | Investigator | na |
| Marina       | Taurel       | na | MD      | Hôpital l'Archet 1, Centre Hospitalier Universitaire de Nice | Nice, France             | Investigator | na |
| Gaël         | Bourdin      | na | MD      | Centre Hospitalier Saint Joseph-Saint Luc                    | Lyon, France             | Investigator | na |
| Pierre       | Donze        | na | MD      | Centre Hospitalier Saint Joseph-Saint Luc                    | Lyon, France             | Investigator | na |
| Christian    | Pommier      | na | MD      | Centre Hospitalier Saint Joseph-Saint Luc                    | Lyon, France             | Investigator | na |
| Sylvène      | Rosselli     | na | MD      | Centre Hospitalier Saint Joseph-Saint Luc                    | Lyon, France             | Investigator | na |
| Marine       | Simonin      | na | MD      | Centre Hospitalier Saint Joseph-Saint Luc                    | Lyon, France             | Investigator | na |
| Jean-Damien  | Ricard       | na | MD, PhD | Hôpital Louis Mourier, APHP                                  | Colombes, France         | Investigator | na |
| Ingrid       | Thiry        | na | MD      | Hôpital Louis Mourier, APHP                                  | Colombes, France         | Investigator | na |
| Santiago     | Freita ramos | na | MD      | Hôpital Louis Mourier, APHP                                  | Colombes, France         | Investigator | na |
| Charles      | Verney       | na | MD      | Hôpital Louis Mourier, APHP                                  | Colombes, France         | Investigator | na |
| Fabrice      | Uhel         | na | MD      | Hôpital Louis Mourier, APHP                                  | Colombes, France         | Investigator | na |
| Isabelle     | Priour       | na | MD      | Hôpital Louis Mourier, APHP                                  | Colombes, France         | Investigator | na |

|            |                  |    |         |                                 |                               |              |    |
|------------|------------------|----|---------|---------------------------------|-------------------------------|--------------|----|
| Damien     | Roux             | na | MD, PhD | Hôpital Louis Mourier, APHP     | Colombes, France              | Investigator | na |
| Alexandra  | Beurton          | na | MD      | Hôpital Pitie Salpêtrière, APHP | Paris, France                 | Investigator | na |
| Côme       | Bureau           | na | MD      | Hôpital Pitie Salpêtrière, APHP | Paris, France                 | Investigator | na |
| Robin      | Déléris          | na | MD      | Hôpital Pitie Salpêtrière, APHP | Paris, France                 | Investigator | na |
| Julien     | Mayaux           | na | MD      | Hôpital Pitie Salpêtrière, APHP | Paris, France                 | Investigator | na |
| Julien     | Le Marec         | na | MD      | Hôpital Pitie Salpêtrière, APHP | Paris, France                 | Investigator | na |
| Safaa      | Nemlaghi         | na | MD      | Hôpital Pitie Salpêtrière, APHP | Paris, France                 | Investigator | na |
| Sébastien  | Clerc            | na | MD      | Hôpital Pitie Salpêtrière, APHP | Paris, France                 | Investigator | na |
| Aleandre   | Demoule          | na | MD, PhD | Hôpital Pitie Salpêtrière, APHP | Paris, France                 | Investigator | na |
| Elise      | Morawiec         | na | MD      | Hôpital Pitie Salpêtrière, APHP | Paris, France                 | Investigator | na |
| Benjamin   | Picard           | na | MD      | Hôpital Pitie Salpêtrière, APHP | Paris, France                 | Investigator | na |
| Jérémie    | Pichon           | na | MD      | Hôpital Pitie Salpêtrière, APHP | Paris, France                 | Investigator | na |
| Pierre     | Chafiotte        | na | MD      | Hôpital Pitie Salpêtrière, APHP | Paris, France                 | Investigator | na |
| Sophie     | Menat            | na | MD      | Hôpital Pitie Salpêtrière, APHP | Paris, France                 | Investigator | na |
| Sandrine   | Pontier          | na | MD      | Hôpital Larrey                  | Toulouse, France              | Investigator | na |
| Frédérique | Legenne          | na | MD      | Hôpital Larrey                  | Toulouse, France              | Investigator | na |
| Lila       | Bouadma          | na | MD, PhD | Hôpital Bichat, APHP            | Hôpital Bichat, Paris, France | Investigator | na |
| Moustafa   | Abdel-Nabey      | na | MD      | Hôpital Bichat, APHP            | Hôpital Bichat, Paris, France | Investigator | na |
| Tiphaine   | Girard           | na | MD      | Hôpital Bichat, APHP            | Hôpital Bichat, Paris, France | Investigator | na |
| Pierre     | Jaquet           | na | MD      | Hôpital Bichat, APHP            | Hôpital Bichat, Paris, France | Investigator | na |
| Juliette   | Patrier          | na | MD      | Hôpital Bichat, APHP            | Hôpital Bichat, Paris, France | Investigator | na |
| Simona     | Presente         | na | MD      | Hôpital Bichat, APHP            | Hôpital Bichat, Paris, France | Investigator | na |
| Julien     | Leroy            | na | MD      | Hôpital Saint-Louis, APHP       | Paris, France                 | Investigator | na |
| Frederic   | Mechai           | na | MD      | Hôpital Avicenne, APHP          | Bobigny, France               | Investigator | na |
| Hugues     | Cordel           | na | MD      | Hôpital Avicenne, APHP          | Bobigny, France               | Investigator | na |
| Nolan      | Hassold-Rugolino | na | MD      | Hôpital Avicenne, APHP          | Bobigny, France               | Investigator | na |
| Malo       | Emery            | na | MD      | Hopital Saint Camille           | Bry-Sur-Marnes                | Investigator | na |
