# Supplementary material
Source: PubMed Central journal article supplement (PMC10034664)
Supplement: jamainternmed-e230456-s004.pdf [file jamainternmed-e230456-s004.pdf]

## Data Sharing Statement

Labbé. Effects of Standard-Dose Prophylactic, High-Dose Prophylactic, and Therapeutic Anticoagulation in Patients With Hypoxemic COVID-19 Pneumonia. *JAMA Intern Med*. Published March 22, 2023. doi:10.1001/jamainternmed.2023.0456

### Data

**Data available:** No

### Additional Information

**Explanation for why data not available:** The trial steering committee will work to make study data available on legitimate requests. Notwithstanding, the steering committee must grant that any proposed publication should be of high quality, respect the commitments the study participants agreed on in the consent forms and ethical approvals, and fulfil the related legal and regulatory requirements (e.g., concerning data protection and privacy). The steering committee has the right to review and comment on any draft manuscript prior to publication.
